# Supplementary material
Source: publisher figshare collection journal article supplement (https://springernature.figshare.com/ndownloader/files/20373396)
Supplement: Supplementary file 1 [file 20373396]

*Additional file 1 – Individual results of locomotor activity and feeding behaviours and rhythms of the cats.*

| **Name** | **Variable** | **Mean DCD (km) and DFI (g)** | **P (h)** | **Am** | **Mode** | **IS** | **IV** | **L5 onset (hh:mm)** | **Variable ch** | **Global ch** |
| --- | --- | --- | --- | --- | --- | --- | --- | --- | --- | --- |
| Fanzine | AR | 0.78 ± 0.05 | 24 | 387 | B | 0.35 | 1.79 | 00:00 | Diurnal | Diurnal |
| *FR* | *31.4 ± 2.2* | *27* | *X* | *A* | *0.23* | *2.42* | *23:00* | *Diurnal* |
| Fast | AR | 1.07 ± 0.10 | 24 | 535 | B | 0.42 | 1.88 | 11:00 | Nocturnal | Nocturnal |
| *FR* | *55.6 ± 4.1* | *24* | *249* | *U* | *0.36* | *2.03* | *11:00* | *Nocturnal* |
| Favela | AR | 0.54 ± 0.05 | 24 | 147 | B | 0.16 | 1.57 | 01:00 | Diurnal | Diurnal |
| *FR* | *36.0 ± 4.5* | *24* | *236* | *U* | *0.34* | *2.07* | *12:00* | *Ambiguous* |
| Flora | AR | 0.88 ± 0.09 | 24 | 297 | U | 0.29 | 1.75 | 00:00 | Diurnal | Diurnal |
| *FR* | *72.4 ± 4.6* | *15* | *X* | *A* | *0.20* | *2.38* | *21:00* | *Diurnal* |
| Fourrure | AR | 0.73 ± 0.08 | 24 | 399 | B | 0.49 | 2.08 | 01:00 | Diurnal | Diurnal |
| *FR* | *27.2 ± 2.6* | *24* | *165* | *B* | *0.24* | *2.27* | *12:00* | *Ambiguous* |
| Fredon | AR | 0.90 ± 0.08 | 24 | 395 | U | 0.32 | 2.37 | 01:00 | Diurnal | Diurnal |
| *FR* | *41.1 ± 3.2* | *24* | *390* | *U* | *0.40* | *1.59* | *00:00* | *Ambiguous* |
| Frimousse | AR | 0.67 ± 0.05 | 24 | 284 | B | 0.36 | 1.69 | 22:00 | Diurnal | Diurnal |
| *FR* | *40.1 ± 1.9* | *18* | *X* | *A* | *0.25* | *2.28* | *22:00* | *Ambiguous* |
| Frippon | AR | 0.56 ± 0.06 | 24 | 290 | B | 0.48 | 1.62 | 10:00 | Nocturnal | Nocturnal |
| *FR* | *40.9 ± 3.4* | *24* | *225* | *U* | *0.24* | *1.99* | *13:00* | *Nocturnal* |
| Fleche | AR | 2.45 ± 0.11 | 24 | 468 | B | 0.42 | 1.42 | 11:00 | Nocturnal | Nocturnal |
| *FR* | *37.4 ± 2.2* | *24* | *342* | *B* | *0.39* | *1.78* | *11:00* | *Nocturnal* |
| Flocon | AR | 3.32 ± 0.18 | 24 | 749 | B | 0.55 | 1.41 | 11:00 | Nocturnal | Nocturnal |
| *FR* | *48.3 ± 2.4* | *24* | *334* | *B* | *0.31* | *2.24* | *11:00* | *Nocturnal* |
| Fluor | AR | 3.81 ± 0.13 | 24 | 724 | B | 0.52 | 1.18 | 11:00 | Ambiguous | Nocturnal |
| *FR* | *64.9 ± 4.6* | *24* | *245* | *B* | *0.38* | *2.05* | *11:00* | *Ambiguous* |
| Fouine | AR | 1.58 ± 0.11 | 24 | 342 | B | 0.36 | 1.29 | 22:00 | Diurnal | Diurnal |
| *FR* | *36.7 ± 2.9* | *24* | *177* | *B* | *0.25* | *1.82* | *22:00* | *Diurnal* |
| Franklin | AR | 4.13 ± 0.17 | 24 | 374 | B | 0.35 | 1.38 | 22:00 | Diurnal | Diurnal |
| *FR* | *59.4 ± 2.1* | *24* | *161* | *B* | *0.25* | *2.01* | *12:00* | *Ambiguous* |
| Freddy | AR | 2.99 ± 0.18 | 24 | 667 | B | 0.49 | 1.35 | 11:00 | Nocturnal | Nocturnal |
| *FR* | *57.6 ± 6.1* | *24* | *263* | *B* | *0.36* | *1.86* | *11:00* | *Nocturnal* |

*“DCD”: daily covered distance, “DFI”: daily food intake; “P”: period; “Am”: Amplitude; “IS”: Interdaily Stability; “IV”: Intradaily Variability; “L5”: Least active 5 hours; “Ch”: chronotype; “AR”: activity rhythm, “FR”: feeding rhythm; “U”: unimodal, “B”: bimodal, “A”: arrhythmic.
Rhythms were considered nocturnal when the least active 5 hours (L5) were calculated as diurnal and visual observation of actograms and daily patterns confirmed this nocturnality. Rhythms were considered as diurnal when the reverse was true. Rhythms were considered ambiguous when the calculated L5 was unreliable because of bimodal patterns (discussed in the discussion) and not confirmed by visual observation of actograms and daily patterns. The chronotypes of individuals were later determined taking all observations into account.*
